# Supplementary material
Source: publisher site journal article supplement (https://www.spandidos-publications.com/463/downloadSupplementary)
Supplement: Supplementary file 1 [file downloadSupplementary]

Figure S1. Identification of hub genes by comparison of multiple datasets. (A) Venn diagram indicating the intersection of DEGs obtained from TCGA, GSE76297, GSE26566, GSE32879 and GSE45001. (B) The table lists specific genes for each intersection. TCGA, The Cancer Genome Atlas; DEGs, differentially expressed protein-coding genes.

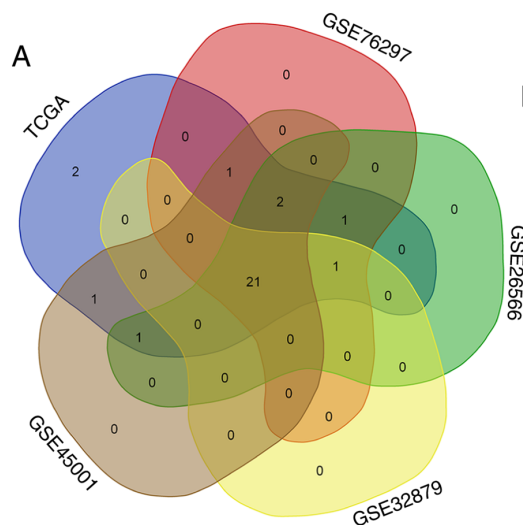

| Datasets                                    | Total | Genes                                                                                                                            |
|---------------------------------------------|-------|----------------------------------------------------------------------------------------------------------------------------------|
| TCGA GSE76297 GSE26566<br>GSE32879 GSE45001 | 21    | FGA MKI67 CDK1 FOXM1<br>EHHADH ACOX1 APOA1<br>TOP2A ITGA2 GSNF APOE<br>FGG APOA2 LAMC2 ALB<br>APOB SERPINC1 C3 KNG1<br>PRC1 AHSG |
| TCGA GSE76297 GSE26566<br>GSE32879          | 1     | CCNB2                                                                                                                            |
| TCGA GSE76297 GSE26566<br>GSE45001          | 2     | RRM2 CEP55                                                                                                                       |
| TCGA GSE76297 GSE26566                      | 1     | KIF2C                                                                                                                            |
| TCGA GSE76297 GSE45001                      | 1     | SERPINA1                                                                                                                         |
| TCGA GSE26566 GSE45001                      | 1     | NEK2                                                                                                                             |
| TCGA GSE45001                               | 1     | UBE2C                                                                                                                            |
| TCGA                                        | 2     | C4A BIRC5                                                                                                                        |

Figure S2. ROC curves for (A) *CDK1*, (B) *MKI67*, (C) *PRC1* and (D) *TOP2A*. The x-axis represents specificity; the y-axis represents sensitivity. AUC is marked in blue. ROC, receiver operating characteristic; AUC, area under the curve; *CDK1*, cyclin dependent kinase 1; *MKI67*, marker of proliferation Ki-67; *PRC1*, protein regulator of cytokinesis 1; *TOP2A*, DNA topoisomerase II  $\alpha$ .

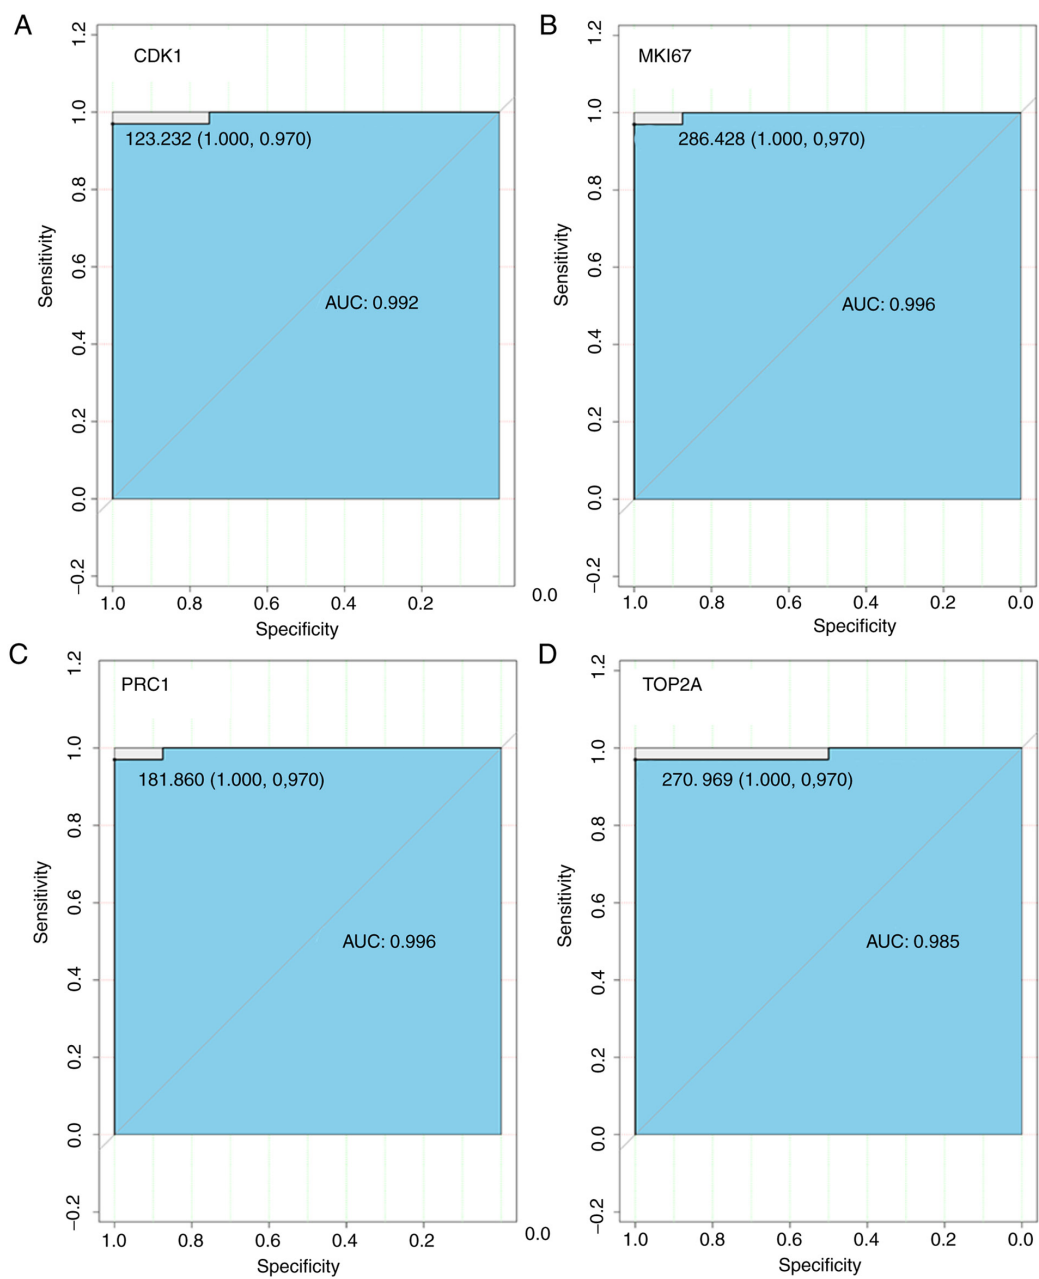

Figure S3. Correlation analysis between gene expression and tumor staging. (A) *ACOX1*, (B) *APOA2*, (C) *APOB*, (D) *FGA* and (E) *FGG*. *ACOX1*, acyl-CoA oxidase 1; *APOA2*, apolipoprotein A2; *APOB*, apolipoprotein B; *FGA*, fibrinogen  $\alpha$  chain; *FGG*, fibrinogen  $\gamma$  chain.

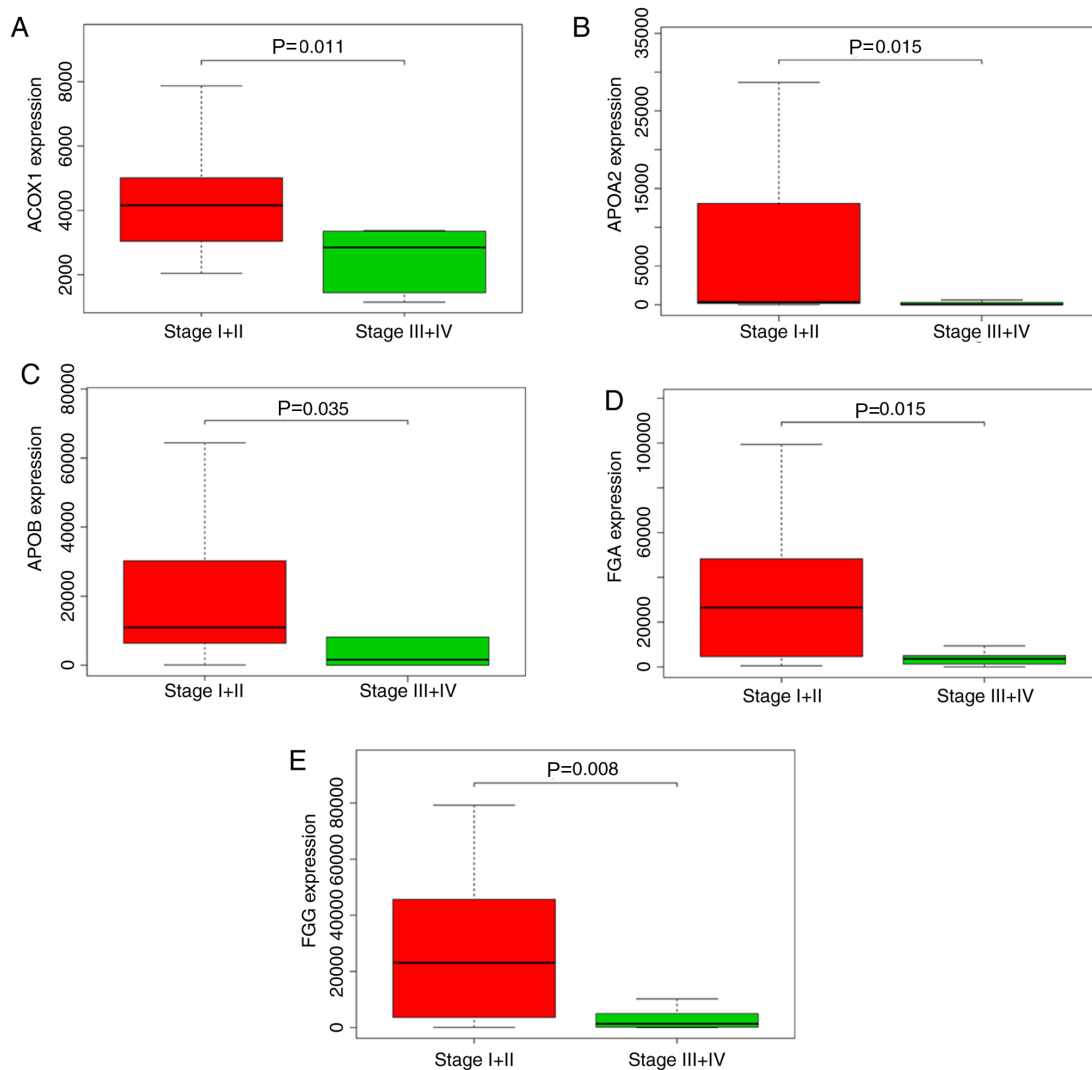

Table SI. Primer sequence for RT-qPCR.

| Gene symbol    | Primer sequences                                                   | Annealing temperature (°C) | Product length (bp) |
|----------------|--------------------------------------------------------------------|----------------------------|---------------------|
| <i>β-actin</i> | F: 5'-GTGGCCGAGGACTTTGATTG-3'<br>R: 5'-CCTGTAACAACGCATCTCATATT-3'  | 60                         | 73                  |
| <i>MKI67</i>   | F: 5'-TCTGGGTTACCTGGTCTTAGTTC-3'<br>R: 5'-CCCTTTTGAGAGGCGTATTAG-3' | 60                         | 163                 |
| <i>TOP2A</i>   | F: 5'-CAAAAAGTCAGTCTTCCACCTC-3'<br>R: 5'-AGGCTTTTGAGAGACACCAGA-3'  | 60                         | 104                 |
| <i>PRC1</i>    | F: 5'-CTATTCTGAGTTTGCGAAGGAT-3'<br>R: 5'-TTCTCAGGACTGGATGTTGGT-3'  | 60                         | 133                 |
| <i>CDK1</i>    | F: 5'-GGAACCTCGTCATCCAAAT-3'<br>R: 5'-TGTA CTGACCAGGAGGGAT-3'      | 60                         | 131                 |

*MKI67*, marker of proliferation Ki-67; *TOP2A*, DNA topoisomerase II  $\alpha$ ; *PRC1*, protein regulator of cytokinesis 1; *CDK1*, cyclin dependent kinase I; F, forward; R, reverse; bp, base pairs.

Table SII. GO enrichment analysis of the upregulated genes.

| GO-ID      | P-value  | Description                                                   | Genes                                                                                                                                                                                                                                                                                                                                                                                                                                                                 |
|------------|----------|---------------------------------------------------------------|-----------------------------------------------------------------------------------------------------------------------------------------------------------------------------------------------------------------------------------------------------------------------------------------------------------------------------------------------------------------------------------------------------------------------------------------------------------------------|
| GO:0098641 | 1.71E-06 | Cadherin binding involved in cell-cell adhesion               | <i>ALDOA, LAD1, PFKP, S100A11, ANLN, SFN, FLNA, ANXA2, NOTCH3, PKM, EPCAM, EVPL, CCNB2, PKP3, CAPG, DBN1, EPS8L1</i>                                                                                                                                                                                                                                                                                                                                                  |
| GO:0030198 | 2.23E-06 | Extracellular matrix organization                             | <i>COL4A2, COL4A1, PDGFA, NPNT, ITGB4, ITGA2, SPINT1, SOX9, DDR1, LAMB3, ITGB8, LAMA5, LAMC2, SPP1</i>                                                                                                                                                                                                                                                                                                                                                                |
| GO:0005913 | 6.70E-06 | Cell-cell adherens junction                                   | <i>ALDOA, LAD1, PFKP, S100A11, ANLN, SFN, NECTIN4, FLNA, ANXA2, NOTCH3, PKM, EVPL, CCNB2, PKP3, CAPG, DBN1, EPS8L1</i>                                                                                                                                                                                                                                                                                                                                                |
| GO:0098609 | 1.64E-05 | Cell-cell adhesion                                            | <i>ALDOA, LAD1, PFKP, S100A11, ANLN, SFN, ANXA2, NOTCH3, PKM, EPCAM, EVPL, CCNB2, CAPG, DBN1, EPS8L1</i>                                                                                                                                                                                                                                                                                                                                                              |
| GO:0070062 | 2.20E-05 | Extracellular exosome                                         | <i>SLC44A2, NPNT, MMP7, PKM, EPCAM, DMKN, HIST3H2A, LOXL4, RAB25, TUBA1A, NQO1, TUBB3, ADAM9, CDK1, ZDHHC1, EPN3, LAD1, PFKP, SPINT1, NECTIN4, FLNA, DDR1, EVPL, MELTF, ST14, SLC38A1, MGAT5, EPS8L1, ALDOA, GCNT3, PKHD1, ITGB4, EPHA10, SFN, TPM4, CDH6, ITGB8, KRT7, PAFAH1B3, MYOF, PHLDA3, SPP1, PLP2, COL4A2, TMC4, CPNE7, S100A11, SLC6A14, COL15A1, ATP1A1, TSPAN15, HID1, ADGRG1, ANXA3, LGALS9, ANXA2, WNT7B, C1ORF116, DSG2, LAMA5, RAB34, CAPG, ABCC1</i> |
| GO:0007155 | 4.34E-05 | Cell adhesion                                                 | <i>ITGB4, COL15A1, CTNND2, PTK7, ITGA2, NECTIN4, ADGRG1, GRHL2, CDH6, DDR1, TNFAIP6, LAMB3, DSG2, ITGB8, LAMC2, CD24, NTM, SPP1, ADAM9</i>                                                                                                                                                                                                                                                                                                                            |
| GO:0030496 | 3.21E-04 | Midbody                                                       | <i>CDK1, PRC1, NEK2, CENPF, BIRC5, MTCL1, CEP55, ECT2, ANXA2</i>                                                                                                                                                                                                                                                                                                                                                                                                      |
| GO:0005198 | 4.76E-04 | Structural molecule activity                                  | <i>CLDN7, LAMB3, KRT80, EVPL, CLDN4, LAD1, LAMA5, KRT7, COL15A1, JAG1, TUBA1A, KRT23</i>                                                                                                                                                                                                                                                                                                                                                                              |
| GO:0005911 | 4.84E-04 | Cell-cell junction                                            | <i>DSG2, PDLIM7, PKP3, IQGAP3, PTK7, NECTIN4, ECT2, GRHL2, FLNA, ANXA2</i>                                                                                                                                                                                                                                                                                                                                                                                            |
| GO:0060672 | 5.22E-04 | Epithelial cell morphogenesis involved in placental branching | <i>SPINT2, ST14, GRHL2</i>                                                                                                                                                                                                                                                                                                                                                                                                                                            |

The top 10 GO terms are listed. GO, Gene Ontology.

Table SIII. GO enrichment analysis of the downregulated genes.

| Term       | P-value  | Description                 | Genes                                                                                                                                                                                                                                                                                                                                                                                                                                                                                                                                                                                                                                                                                                                                                                                                                                                                                                                                                                                                                                                                                                                                                                                                                                                                                                                                                                                                                                                                                                                                                                                                                                                                                                                                                                                                                                                                                                                                                                                                                                                                                                                                                                                                                                                                                                                                                                                                                               |
|------------|----------|-----------------------------|-------------------------------------------------------------------------------------------------------------------------------------------------------------------------------------------------------------------------------------------------------------------------------------------------------------------------------------------------------------------------------------------------------------------------------------------------------------------------------------------------------------------------------------------------------------------------------------------------------------------------------------------------------------------------------------------------------------------------------------------------------------------------------------------------------------------------------------------------------------------------------------------------------------------------------------------------------------------------------------------------------------------------------------------------------------------------------------------------------------------------------------------------------------------------------------------------------------------------------------------------------------------------------------------------------------------------------------------------------------------------------------------------------------------------------------------------------------------------------------------------------------------------------------------------------------------------------------------------------------------------------------------------------------------------------------------------------------------------------------------------------------------------------------------------------------------------------------------------------------------------------------------------------------------------------------------------------------------------------------------------------------------------------------------------------------------------------------------------------------------------------------------------------------------------------------------------------------------------------------------------------------------------------------------------------------------------------------------------------------------------------------------------------------------------------------|
| GO:0055114 | 3.02E-48 | Oxidation-reduction process | CYP3A4, ALDH8A1, SC5D, ALDH1L1, HMGCR, CYP2D7, CYP2D6, LDHD, OSGINI, HIBADH, BBOX1, GLDC, PECR, AKR7A3, DAO, HIGD1A, ALDH6A1, CYP1A1, PCBDI, FAXDC2, QDPR, CYP26A1, CYP2E1, CYP1A2, CDOI, POR, HSD11B1, XDH, ADHFE1, FDX1, CYP2B6, GLUDI, HSD17B13, KMO, PAH, DHODH, ALDH4A1, PTGRI, MSMO1, CYP2C9, SCD, CYP2C8, HGD, CYP17A1, PRODH2, DIO1, CYP8B1, BCO2, DCXR, TM7SF2, ASPDH, STEAP4, CYP2J2, CYP2C19, CYP2C18, CYP3A43, MTHFD1, TDO2, MSRA, GRHPR, ACADL, RDH5, DHRS1, AKR1C4, CYP39A1, GPX3, SRD5A1, SRD5A2, SARDH, HPD, ACADM, AIFM1, CYB5A, GRHPR, ACADL, RDH5, DHRS1, ALDH7A1, DHRS3, DHRS4, CYP27A1, AKR1C8P, CYP2A6, CYP2A7, AKR1D1, ALDH9A1, PHYHD1, SORD, CYP4F22, DHRS4L2, AASS, ADH7, PIPOX, ALDH1A1, FMO4, FMO5, CBRI, CYP4A22, MMACHC, DHCR7, FMO3, HAAO, HSD17B6, DMGDH, PNPO, GSTO1, BDHI, GLRX, HSD17B8, BCKDHB, IDO2, FADS2, MSRB1, CYP4F11, CYP4F12, STAB2, DBH, SOD1, ADII, FRRS1, CYP4A11, HSD1L2, AOX1, PHGDH, KDM8, AGMO, CYP4F3, CP, CYP4F2, DPYD, RDH16, HPGD, MGST1, CBS, RETSAT                                                                                                                                                                                                                                                                                                                                                                                                                                                                                                                                                                                                                                                                                                                                                                                                                                                                                                                                                                                                                                                                                                                                                                                                                                                                                                                                                                                                                         |
| GO:0070062 | 3.33E-42 | Extracellular exosome       | ALDH8A1, ADCY1, A2M, RARRES2, GDF2, ALAD, BTB, MASP2, FAM20A, SELENBP1, SYT7, BBOX1, FAH, GOT2, ATP2B2, APOB, GOT1, APOE, LCAT, APOH, CFH, VNN1, CFI, APOM, FTL, F11, ACAA2, F12, GATM, C4A, ABCB11, C4B, PCBDI, LIFR, F9, CDHR5, SERPING1, RND3, SERPINF1, SERPINF2, PGM1, BHMT, F2, ABAT, RBP5, GC, RBP4, ACADSB, SERPINA10, ENPP3, ALDOC, PTHIR, ALDOB, MST1, MME, ASL, ACAT2, ACAT1, AHSG, ARG1, KLKB1, IDH1, FGLI, SPP2, COL18A1, GPD1, BHMT2, PTGRI, ST6GAL1, CFB, UPBI, GGH, HGD, CD5L, GBE1, PONI, QPRT, GK, SLC46A3, RIDA, PON3, STEAP4, PZP, CYP2J2, ARSF, GPLDI, MTHFD1, CFHRI, EFHD1, CFHR3, MSRA, SERPINA7, SERPINA6, TKFC, SERPINA5, SERPINA4, GPX3, SERPINA1, CETP, NT5E, DPP4, CEACAMI, HYAL1, APCS, PEPD, ACOI, TTC38, SAA4, CYB5A, GRHPR, DECRI, C8G, C8A, AMBP, C8B, HAO2, INHBC, SLC27A2, TF, SORD, C9, C3, ABHD6, C6, C5, DPYS, SEC14L3, SEC14L2, CPN2, GALK1, CBRI, SERPINCI, HAAO, C2, NAT8, CES3, SHMT1, CES2, FTCD, IGF2, SOD1, PCK2, PLG, PCK1, KHK, SDHB, ORMI, AFM, PYGL, AOX1, PHGDH, GFRAI, GAMT, SERPINDI, CP, PSATI, HPGD, CD14, ORM2, ALDH1L1, THRB, IQGAP2, BPHL, VTN, ENPEP, CXCL12, CMBL, APOA4, TTR, AZGP1, APOA2, SLC16A1, APOA1, SLC25A25, PGLYRP2, PGRMCI, ST3GAL6, AKR7A3, ALDH6A1, QDPR, FBP1, METTL7A, ASS1, FOLH1B, CLU, APOC1, KMO, PAH, AGMAT, ANGPTL6, GALM, FGG, FGA, FGB, ALB, APOC3, ENTDP5, TMEM192, SCARB1, NDRG2, ACY3, SLC6A13, ACMSD, EPHX2, SELENOP, ABHD14B, AK4, ABCB4, TST, LYVE1, DSG1, ALDH2, SLC13A3, FABP1, CPB2, DCXR, SLC5A12, ANOI, SAT2, SORLI, ACOT2, HP, PRDX3, AMN, CRYLI, AKR1C4, ITIH1, ANG, PROZ, ITIH4, RHOB, ACOT13, ITIH2, LBP, CAT, ITIH3, HPD, KNG1, SHBG, PPP2R1B, DDC, ACADM, IGFALS, MAN1A1, SLC9A3R2, HAGH, ALDH7A1, FOLH1, CTH, DHRS4, CFL2, PKLR, DDT, PEBP1, CUX2, AKR1D1, PROSI, UGP2, ALDH9A1, XYL, ECHS1, ADH6, C1R, C1S, OAF, PLPP3, PBLD, ALDH1A1, LRG1, FCN2, PNPO, ENO3, BDH2, HRG, APMAP, SLC39A5, GSTO1, HBB, GLRX, GSTA1, COBLL1, GSTA2, HPN, RNASE4, FETUB, HOGAI, ISOCI, MANIC1, HPR, XPNPEP2, ELFN1, AIBG, CYP4A11, GLYAT, HPX, C1RL, SH3BGR2, GPT, HIBCH, SCP2, IGFBP3, UGT2B7, AQP7P3, A2M, PZP, HP, VTN, APOA4, CFHR3, APOA2, APOA1, ITIH1, APOE, APOA5, ITIH4, CFH, ITIH2, KNG1, APCS, C4A, C4B, SERPING1, C8G, C8A, AMBP, SERPINF2, F2, PROSI, GC, TF, C9, C3, CLU, C1R, C1S, CPN2, AHSG, FGG, FGA, FCN3, FGB, ALB, BCHE, FCN2, SERPINC1, HRG, HBB, ANGPTL4, CFB, CD5L, C4BPA, PLG, HPR, HPM, ORMI, AFM, HPX, PONI, CP, ORM2 |
| GO:0072562 | 6.02E-35 | Blood microparticle         |                                                                                                                                                                                                                                                                                                                                                                                                                                                                                                                                                                                                                                                                                                                                                                                                                                                                                                                                                                                                                                                                                                                                                                                                                                                                                                                                                                                                                                                                                                                                                                                                                                                                                                                                                                                                                                                                                                                                                                                                                                                                                                                                                                                                                                                                                                                                                                                                                                     |

Table SIII. Continued.

| Term       | P-value  | Description                  | Genes                                                                                                                                                                                                                                                                                                                                                                                                                                                                                                                                                                                                                                                                                                                                                                                                                                                                                                                                                                                                                                                                                                                                                                       |
|------------|----------|------------------------------|-----------------------------------------------------------------------------------------------------------------------------------------------------------------------------------------------------------------------------------------------------------------------------------------------------------------------------------------------------------------------------------------------------------------------------------------------------------------------------------------------------------------------------------------------------------------------------------------------------------------------------------------------------------------------------------------------------------------------------------------------------------------------------------------------------------------------------------------------------------------------------------------------------------------------------------------------------------------------------------------------------------------------------------------------------------------------------------------------------------------------------------------------------------------------------|
| GO:0031090 | 8.59E-28 | Organelle membrane           | <i>TM7SF2, CYP3A4, CYP2J2, CYP2C19, CYP2B6, CYP2C18, CYP4F22, CYP3A43, FMO4, FMO5, CYP39A1, CYP4A22, PGRMC1, FMO3, SLC39A8, SRD5A1, SRD5A2, CYP1A1, CYP2C9, CYP2C8, CYP26A1, EPHX1, CYP4F11, CYP4F12, CYP1A2, AADAC, CYP4A11, TFPI, UGT2B4, CYP2A6, CYP4F3, CYP2A7, UGT2B10, CYP4F2, RDH16, UGT2B15, CYP8B1, UGT2B7, MGST2</i>                                                                                                                                                                                                                                                                                                                                                                                                                                                                                                                                                                                                                                                                                                                                                                                                                                              |
| GO:0005759 | 2.48E-26 | Mitochondrial matrix         | <i>ETNPPL, BTD, AMT, OGDHL, ACOT2, BPHL, PRDX3, AGXT, HIBADH, ACSF2, GLDC, GOT2, ALASI, HADH, DHTKDI, SARDH, GPT2, HMGCL, ACSM2B, AADAT, SUOX, ALDH6A1, ACADM, ACADS, SUCLG2, ALDH5A1, OTC, ACSM2A, DECR1, ACADL, HAGH, ALDH7A1, CYP27A1, ABAT, PCCB, ACADSB, NAGS, ADHFE1, FDX1, CA5A, GLUDI, ECHS1, AASS, ACAT1, GLS2, MTHFS, MUT, IVD, ETFDH, ALDH4A1, DMGDH, BDHI, HSD17B8, GCDH, BCKDHB, AK3, AK4, PCK2, SOD1, CPS1, MMAB, TST, DBT, GLYAT, HMGCS2, MLYCD, ALDH2, AGXT2, HIBCH, ACSM5, BCO2, PC</i>                                                                                                                                                                                                                                                                                                                                                                                                                                                                                                                                                                                                                                                                    |
| GO:0006805 | 1.48E-23 | Xenobiotic metabolic process | <i>CYP3A4, CYP2J2, CYP2C19, CYP2B6, CYP2C18, CYP2D7, CYP2D6, RORC, BPHL, CMBL, SULT1A1, FMO3, AKR7A3, ACSM2B, CES2, CES1, CYP2C9, ACY3, CYP2C8, NAT2, EPHX2, EPHX1, CYP26A1, CYP2E1, CYP1A2, POR, AADAC, GLYAT, NRI2, HNF4A, SULT1B1, UGT2B4, UGT2B15, MGST1, MGST2</i>                                                                                                                                                                                                                                                                                                                                                                                                                                                                                                                                                                                                                                                                                                                                                                                                                                                                                                     |
| GO:0005576 | 3.26E-23 | Extracellular region         | <i>BMP10, PLGLA, GDF2, RARRES2, A2M, CNDP1, MASP1, BTD, MASP2, VTN, NOTUM, CXCL12, DNASE1L3, APOA4, CFP, TTR, AZGP1, APOA2, APOB, LPA, APOA1, APOE, LCAT, APOF, APOA5, CFH, APOH, RGN, CFI, APOM, F11, F12, F10, C4A, C4B, LRCOL1, IL27, COLEC10, F9, SERPING1, F7, COLEC11, FGF21, CLEC4M, SERPINF1, SERPINF2, F2, TFPI, GC, RBP4, LFPAL2, HSD17B13, CLU, MST1, APOC1, GREM2, LEAP2, AHSG, F13B, FGG, FGA, ALB, FGB, BCHE, KLKB1, APOC3, GALP, CDA, CDC37L1, SPP2, ANGPLT4, COL18A1, GLT1D1, NTF3, CFB, SELENOP, CD5L, HGF, FAMI98A, NPW, PONI, PZF, INS-IGF2, LEPR, HP, ASGRI, CFHR2, CFHR4, SERPINA7, HAMP, ANG, ITH1, SERPINA5, PROZ, SERPINA4, GPX3, ITH4, SERPINA1, CETP, ITH2, LBP, ITH3, CFHR5, GHR, SHBG, KNG1, APC5, PRG4, SPACA7, SAA4, IGFALS, IL6R, C8G, PROC, C8A, AMBP, C8B, INHBC, PROS1, TF, MBL2, C9, C3, C6, OXT, C5, CXCL2, DHRS4L2, C1R, ADH7, C1S, CPN2, FNDC5, FCN3, LRG1, FCN2, PLA2G12B, SERPINC1, PRAP1, HRG, C2, PLGLB2, HGFAC, PLGLB1, HBB, THPO, ABHD15, RNASE4, FETUB, IGF1, VWCE, C4BPB, IGF2, C4BPA, DBH, SOD1, CCL16, PLG, HPR, AIBG, ORMI, AFM, BMBER, TENM1, HPX, LIPG, SERPIND1, CP, IGFBP1, LIPC, IGFBP3, CD14, ORM2, IGFBP4, ENHO</i> |
| GO:0016491 | 4.95E-22 | Oxidoreductase activity      | <i>CYP3A4, ASPDH, SC5D, ALDH1L1, CYP2C19, CYP2D6, ADH1C, ADH1B, OSGINI, SLC9B2, SARDH, SUOX, CYP1A1, AIFM1, CYP2E1, CYP1A2, POR, DHRS1, ALDH7A1, HAO2, AKRIC8P, HSD11B1, SORD, ADHFE1, HSD17B13, DHRS4L2, AASS, ADH6, ADH7, PIPOX, ALDH1A1, MMACHC, ETFDH, ALDH4A1, DMGDH, HSD17B6, BDH2, HSD17B4, GSTO1, BDH1, PTGRI, MSMO1, CYP2C9, SCD, ADI1, SDHB, HSDL2, AOX1, ALDH2, HPGD, DCXR, RETSAT</i>                                                                                                                                                                                                                                                                                                                                                                                                                                                                                                                                                                                                                                                                                                                                                                           |
| GO:0005615 | 1.28E-21 | Extracellular space          | <i>BMP10, ALAD, GDF2, HFE2, MASP1, BTD, CRHBP, VTN, SELENBP1, CXCL12, APOA4, CFP, AZGP1, TTR, APOB, APOA1, SPX, APOE, LCAT, PPP1R1A, APOA5, CFH, APOH, CFI, VNN3, F11, F12, C4A, C4B, IL27, F9, SERPING1, F7, FGF21, CD36, SERPINF1, SERPINF2, F2, TFPI, GC, C3PI, XDH, RBP4, SERPINA10, SERPINA11, ENPP1, CLU, MST1, GREM2, AHSG, ARG1, FGG, FGA, ALB, FGB, KLKB1, APOC3, ANGPLT3, ANGPLT4, COL18A1, CFB, GGH, SELENOP, CD5L, HGF, ECM2, TST, PONI, CPB2, CHRDL, PON3, SORL1, GPLD1, HP, AMN, CFHR1, CFHR3, SERPINA7, SERPINA6, HAMP, ANG, SERPINA5, PROZ, SERPINA4, GPX3, SERPINA1, CETP, LBP, CAT, TSKU, GHR, KNG1, HVALI, APC5, CES5A, SAA4, IGFALS, IL6R, PROC, C8A, AMBP, C8B, CFL2, INHBC, PROS1, TF, MBL2, SORD, C3, ADAMTS13, OXT, C5, CXCL2, CPN1, LRG1, SERPINC1, ENO3, C2, LECT2, PCSK6, HGFAC, THPO, CES3, CES2, CES1, FETUB, IGF1, C4BPB, IGF2, C4BPA, DBH, SOD1, CCL16, TMPRSS6, PLG, AIBG, ORMI, AFM, BMBER, HPX, CMTM8, LIPG, C1RL, GPT, SERPIND1, CP, IGFBP1, LIPC, IGFBP3, IGFBP4, ORM2, CD14</i>                                                                                                                                                        |

Table SIII. Continued.

| Term       | P-value  | Description       | Genes                                                                                                                                                                                                                                                                                                                                            |
|------------|----------|-------------------|--------------------------------------------------------------------------------------------------------------------------------------------------------------------------------------------------------------------------------------------------------------------------------------------------------------------------------------------------|
| GO:0008152 | 1.46E-20 | Metabolic process | <i>FTCDNLI, AQP9, EHHADH, ECHDC2, ECHDC3, ACSS2, UGT3A1, ACSS3, ACAT1, ACSF2, AFMID, MUT, ACSLI, UGT1A3, UGT1A4, INSIG1, UGT2A1, GSTO1, FAHD2A, ACSM2B, GSTA1, EC12, ACAA2, GSTA2, CES1, ACO1, SUCLG2, ACY3, BCKDHB, NAT2, ACSM2A, HOGA1, EPHX2, ISOC1, GRHPR, UGT1A1, MAN1C1, AADAC, DBT, UGT2B4, UGT2B15, SCP2, UGP2, UGT2B7, ACSM5, ACAA1</i> |

The top 10 GO terms are listed. GO, Gene Ontology.

Table SIV. KEGG enrichment analysis of the upregulated genes.

| Term     | P-value  | Description                                            | Genes                                                                                                    |
|----------|----------|--------------------------------------------------------|----------------------------------------------------------------------------------------------------------|
| hsa04512 | 7.86E-06 | ECM-receptor interaction                               | <i>COL4A2, LAMB3, COL4A1, LAMA5, ITGB8, ITGB4, ITGA2, LAMC2, SPP1</i>                                    |
| hsa04510 | 1.52E-04 | Focal adhesion                                         | <i>COL4A2, LAMB3, COL4A1, LAMA5, ITGB8, PDGFA, ITGB4, ITGA2, LAMC2, FLNA, SPP1</i>                       |
| hsa05222 | 4.93E-04 | Small cell lung cancer                                 | <i>E2F1, COL4A2, LAMB3, COL4A1, LAMA5, ITGA2, LAMC2</i>                                                  |
| hsa05200 | 6.86E-04 | Pathways in cancer                                     | <i>E2F1, COL4A2, CTBP2, COL4A1, PDGFA, ARNT2, ITGA2, LPAR2, BIRC5, TGFB2, LAMB3, WNT7B, LAMA5, LAMC2</i> |
| hsa05410 | 0.002275 | Hypertrophic cardiomyopathy (HCM)                      | <i>ITGB8, ITGB4, ITGA2, CACNB3, TPM4, TGFB2</i>                                                          |
| hsa04151 | 0.002451 | PI3K-Akt signaling pathway                             | <i>COL4A2, LAMB3, COL4A1, LAMA5, ITGB8, PDGFA, ITGB4, ITGA2, LPAR2, LAMC2, PPP2R2C, SPP1</i>             |
| hsa05414 | 0.003147 | Dilated cardiomyopathy                                 | <i>ITGB8, ITGB4, ITGA2, CACNB3, TPM4, TGFB2</i>                                                          |
| hsa05412 | 0.008138 | Arrhythmogenic right ventricular cardiomyopathy (ARVC) | <i>DSG2, ITGB8, ITGB4, ITGA2, CACNB3</i>                                                                 |
| hsa05146 | 0.008433 | Amoebiasis                                             | <i>COL4A2, LAMB3, COL4A1, LAMA5, LAMC2, TGFB2</i>                                                        |
| hsa04540 | 0.020529 | Gap junction                                           | <i>CDK1, PDGFA, ITPR3, TUBA1A, TUBB3</i>                                                                 |
| hsa04390 | 0.033716 | Hippo signaling pathway                                | <i>WNT7B, DLG3, TEAD2, BIRC5, PPP2R2C, TGFB2</i>                                                         |
| hsa05145 | 0.041832 | Toxoplasmosis                                          | <i>LAMB3, LAMA5, MAPK13, LAMC2, TGFB2</i>                                                                |
| hsa04115 | 0.045352 | p53 signaling pathway                                  | <i>CDK1, CCNB2, RRM2, SFN</i>                                                                            |

KEGG, Kyoto Encyclopedia of Genes and Genomes.

Table SV. KEGG enrichment analysis of the downregulated genes.

| Term     | P-value  | Description                         | Genes                                                                                                                                                                                                                                                                                                                                                                                                                                                                                                                                                                                                                                                                                                                                                                                                                                                                                                                                                                                                                                                                                                                                                                                                                                                                                                                                                                                                                                                                                                                                                                                                                                                                                                                                                             |
|----------|----------|-------------------------------------|-------------------------------------------------------------------------------------------------------------------------------------------------------------------------------------------------------------------------------------------------------------------------------------------------------------------------------------------------------------------------------------------------------------------------------------------------------------------------------------------------------------------------------------------------------------------------------------------------------------------------------------------------------------------------------------------------------------------------------------------------------------------------------------------------------------------------------------------------------------------------------------------------------------------------------------------------------------------------------------------------------------------------------------------------------------------------------------------------------------------------------------------------------------------------------------------------------------------------------------------------------------------------------------------------------------------------------------------------------------------------------------------------------------------------------------------------------------------------------------------------------------------------------------------------------------------------------------------------------------------------------------------------------------------------------------------------------------------------------------------------------------------|
| hsa01100 | 1.58E-62 | Metabolic pathways                  | CYP3A4, ALAD, SC5D, BTD, EHHADH, HIBADH, GLDC, FAH, GOT2, GOT1, MAT1A, GPT2, ACSM2B, AADAT, ACAA2, CYP11A1, GATM, SUCLG2, FAXDC2, ACSM2A, CYP26A1, CYP1A2, CYP2E1, BHMT, PGM1, HSD11B1, ABAT, ACAA1, ENPP7, ACADSB, NAGS, ENPP1, CYP2B6, ALDOC, ENPP3, ALDOB, HMGCS1, ASL, ACAT2, ACAT1, ARG1, PEMT, CDA, IDH1, ALDH4A1, MOCOS1, GCDH, UAP1, ST6GAL1, CYP2C9, CYP2C8, UPBI, HGD, ACACB, CYP17A1, GBE1, HMGCS2, MLYCD, COX6A2, PRODH2, AGXT2, QPRT, GK, IDI1, CYP8B1, NNMT, TM7SF2, CYP2J2, CYP2C19, CYP2C18, MTHFD1, TKFC, GSTZ1, NT5E, SARDH, HYAL1, ACO1, GRHPR, HAO1, G6PC, CYP27A1, SDS, ADK, HAO2, UROCI, SLC27A5, SORD, AASS, DPYS, GCHI, GALK1, CBRI, ACSL1, DHCR7, PLA2G12B, HAAO, HSD17B4, PAPSS2, AGL, ACSL5, HSD17B8, MOGAT3, SHMT1, CES1, BCKDHB, NAT2, AMACR, FTCD, PCK2, PCK1, GBA3, KHK, SDHB, PYGL, AOX1, PHGDH, GAMT, DPYD, PSAT1, ACSM5, CNDP1, HMGCR, ADH1C, ADH1B, ADH1A, ACS2, ACS3, AGXT, CMBL, ST3GAL6, RGN, DAO, HADH, HMGCL, ALDH6A1, SPTLC3, QDPR, HAL, FBP1, CDO1, TAT, PNPLA3, CHPT1, PCCB, XDH, GCCLC, ASS1, GNE, GLUDI, CERS4, PAH, KMO, AGMAT, GALM, MUT, CSAD, IVD, DHODH, NADK2, MSMO1, ACMSD, EPHX2, GALT, AK4, CPS1, MMAB, TST, BAAT, ALDH2, DCXR, PC, ETNPPL, ACOX2, ACOX1, KYNU, NDST3, AMT, OGDHL, SAT2, ACOT2, ACOT1, LSS, AFMID, CRYL1, TDO2, ALASI, AKRIC4, HPD, DDC, ACADM, ACADS, ALDH5A1, OTC, MAN1A1, LPIN2, ACADL, UGT1A1, ALDH7A1, FOLH1, CTH, DHRS3, DHRS4, DGAT2, PANK1, PKLR, CYP2A6, UGT2B10, UGT2B15, AKR1D1, GPAM, ALDH9A1, UGP2, XYLB, DHRS4L2, ADH6, ECHS1, ADH7, PLPP3, PIPOX, GLS2, ALDH1A1, MTHFS, UGT1A3, ADH4, UGT1A4, PNPO, ENO3, UGT2A1, DMGDH, ETNK2, BDH2, BDH1, EBP, HOGA1, IDO2, DBH, MAN1C1, IDNK, ADI1, AMDHD1, DBT, LIPG, UGT2B4, GPT, CYP4F3, HIBCH, CYP4F2, RDH16, LIPC, SCP2, UGT2B7, CBS |
| hsa04610 | 2.15E-31 | Complement and coagulation cascades | MBL2, A2M, C9, MASP1, MASP2, C3, C6, C5, C1R, C1S, F13B, FGG, FGA, FGB, KLKB1, SERPINA5, SERPINC1, CFH, SERPINA1, CFI, C2, KNG1, F1I, F12, F10, C4A, C4B, CFB, F9, C4BPB, SERPING1, F7, C4BPA, PLG, C8G, PROC, C8A, C8B, SERPINF2, F2, TFPI, SERPIND1, PROSI, CPB2                                                                                                                                                                                                                                                                                                                                                                                                                                                                                                                                                                                                                                                                                                                                                                                                                                                                                                                                                                                                                                                                                                                                                                                                                                                                                                                                                                                                                                                                                                |
| hsa01130 | 2.74E-26 | Biosynthesis of antibiotics         | TM7SF2, SC5D, HMGCR, EHHADH, AMT, OGDHL, LSS, ACS2, AGXT, CMBL, GLDC, GOT2, GOT1, RGN, DAO, CAT, HADH, AADAT, ACAA2, ACADM, SUCLG2, ACO1, FAXDC2, OTC, FBP1, TAT, HAO1, ALDH7A1, CTH, SDS, PGM1, HAO2, PKLR, PCCB, ALDH9A1, UGP2, ACAA1, ASS1, ALDOC, ALDOB, HMGCS1, ECHS1, AASS, ACAT2, ASL, ACAT1, ARG1, GALM, ENO3, IDH1, PAPSS2, GCDH, SHMT1, UAP1, MSMO1, BCKDHB, AK3, AK4, PCK2, IDNK, PCK1, DBT, SDHB, HMGCS2, PHGDH, ALDH2, IDI1, PSAT1, CBS                                                                                                                                                                                                                                                                                                                                                                                                                                                                                                                                                                                                                                                                                                                                                                                                                                                                                                                                                                                                                                                                                                                                                                                                                                                                                                              |
| hsa00830 | 1.66E-18 | Retinol metabolism                  | CYP3A4, CYP2B6, CYP2C18, DHRS4L2, ADH1C, ADH1B, ADH6, ADH1A, ADH7, ALDH1A1, UGT1A3, ADH4, UGT1A4, UGT2A1, HSD17B6, CYP1A1, CYP2C9, CYP2C8, CYP26A1, CYP1A2, UGT1A1, RDH5, DHRS3, DHRS4, AOX1, CYP2A6, UGT2B4, UGT2B10, RDH16, UGT2B15, UGT2B7, RETSAT                                                                                                                                                                                                                                                                                                                                                                                                                                                                                                                                                                                                                                                                                                                                                                                                                                                                                                                                                                                                                                                                                                                                                                                                                                                                                                                                                                                                                                                                                                             |
| hsa00071 | 5.23E-18 | Fatty acid degradation              | ACOX1, ACADSB, CPT2, EHHADH, ADH1C, ECHS1, ADH6, ADH1B, ADH7, ADH1A, ACAT2, ACAT1, ACSL1, ADH4, HADH, ACSL5, GCDH, ACAA2, ECI2, ACADM, ACADS, ACADL, ALDH7A1, ALDH2, ALDH9A1, ACAA1, CYP3A4, CYP2C19, CYP2C18, ADH1C, ADH1B, ADH6, ADH1A, ADH7, CYP3A43, CBRI, UGT1A3, SULT1A1, ADH4, UGT1A4, UGT2A1, GSTO1, GSTA1, GSTA2, SULT2A1, CYP1A1, CYP2C9, CYP2C8, NAT2, EPHX1,                                                                                                                                                                                                                                                                                                                                                                                                                                                                                                                                                                                                                                                                                                                                                                                                                                                                                                                                                                                                                                                                                                                                                                                                                                                                                                                                                                                          |
| hsa05204 | 5.95E-18 | Chemical carcinogenesis             | CYP2E1, CYP1A2, UGT1A1, HSD11B1, CYP2A6, UGT2B4, UGT2B10, UGT2B15, MGST1, UGT2B7, MGST2                                                                                                                                                                                                                                                                                                                                                                                                                                                                                                                                                                                                                                                                                                                                                                                                                                                                                                                                                                                                                                                                                                                                                                                                                                                                                                                                                                                                                                                                                                                                                                                                                                                                           |
| hsa00982 | 1.52E-17 | Drug metabolism-cytochrome P450     | CYP3A4, CYP2C19, CYP2B6, CYP2D6, ADH1C, ADH1B, ADH6, ADH1A, ADH7, FMO4, FMO5, UGT1A3, ADH4, UGT1A4, FMO3, UGT2A1, GSTO1, GSTA1, GSTA2, CYP2C9, CYP2C8, CYP2E1, CYP1A2, UGT1A1, AOX1, CYP2A6, UGT2B4, UGT2B10, UGT2B15, MGST1, UGT2B7, MGST2                                                                                                                                                                                                                                                                                                                                                                                                                                                                                                                                                                                                                                                                                                                                                                                                                                                                                                                                                                                                                                                                                                                                                                                                                                                                                                                                                                                                                                                                                                                       |

Table SV. Continued.

| Term     | P-value  | Description                                  | Genes                                                                                                                                                                                                                                                                    |
|----------|----------|----------------------------------------------|--------------------------------------------------------------------------------------------------------------------------------------------------------------------------------------------------------------------------------------------------------------------------|
| hsa01200 | 1.56E-17 | Carbon metabolism                            | <i>ALDOC, GLUDI, AMT, EHHADH, OGDHL, ALDOB, ECHS1, ACAT2, ACSS2, AGXT, ACAT1, GLDC, GOT2, MUT, GOT1, TKFC, RGN, IDH1, ENO3, CAT, GPT2, SHMT1, ALDH6A1, ACADM, ACO1, ACADS, SUCLG2, FBP1, CPS1, IDNK, HAO1, SDHB, SDS, PKLR, HAO2, PHGDH, GPT, HIBCH, PSAT1, PCCB, PC</i> |
| hsa00980 | 3.09E-17 | Metabolism of xenobiotics by cytochrome P450 | <i>CYP3A4, CYP2B6, CYP2D6, ADH1C, ADH1B, ADH6, ADH1A, ADH7, CBR1, AKR1C4, UGT1A3, ADH4, UGT1A4, UGT2A1, AKR7A3, GSTO1, GSTA1, GSTA2, SULT2A1, CYP1A1, CYP2C9, EPHX1, CYP2E1, CYP1A2, UGT1A1, HSD11B1, CYP2A6, UGT2B4, UGT2B10, UGT2B15, MGST1, UGT2B7, MGST2</i>         |
| hsa00280 | 2.08E-16 | Valine, leucine and isoleucine degradation   | <i>ALDH6A1, ACAA2, ACADS, ACADM, ACADS, EHHADH, BCKDHB, HMGCS1, ECHS1, ACAT2, ACAT1, HIBADH, DBT, ALDH7A1, MUT, HMGCS2, IVL, AOX1, ALDH2, ABAT, HIBCH, HADH, PCCB, HMGCL, ALDH9A1, ACAA1</i>                                                                             |

The top 10 KEGG terms are listed. KEGG, Kyoto Encyclopedia of Genes and Genomes.
